# Supplementary material
Source: Springer Nature journal article supplement (https://www.springermedizin.de/resource/supplementary/12998_2013_104_MOESM5_ESM.pdf/9680168)

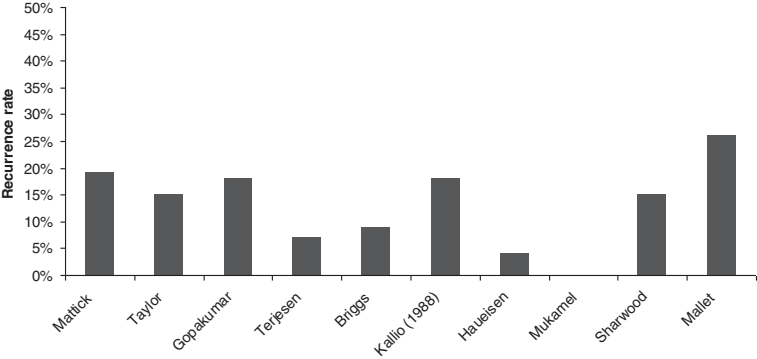

Supplement: MOESM5 [file 9680168]
